# Supplementary material for: Fibrin biopolymer as scaffold candidate to treat bone defects in rats
Source: PubMed Central journal article supplement (PMC6830407; doi:10.1590/1678-9199-jvatitd-2019-0027), 2019-11-04
Supplement: 1678-9199-jvatitd-25-e20190027-s1.pdf [file 1678-9199-jvatitd-25-e20190027-s1.pdf]

## Supplementary Material to “Fibrin biopolymer as scaffold candidate to treat bone defects in rats”

**Additional file 1** – Surface cell markers used on mesenchymal stem cell characterization by flow cytometry.

| <b>MARKER</b> | <b>EXPRESSION</b> | <b>TRADEMARK</b> | <b>REF.CODE</b> | <b>DILUTION</b> | <b>FLUOROCHROME</b> |
|---------------|-------------------|------------------|-----------------|-----------------|---------------------|
| CD 45         | Negative          | ABCAM            | AB123522        | 1/100           | FITC                |
| CD 11b        | Negative          | ABCAM            | AB33816         | 1/100           | PE                  |
| MHC- II       | Negative          | ABCAM            | AB111825        | 1/100           | PE                  |
| RT1- Aw2      | Negative          | ABCAM            | AB119770        | 1/100           | FITC                |
| CD 90         | Positive          | ABCAM            | AB226           | 1/100           | FITC                |
| ICAM1         | Positive          | ABCAM            | AB23835         | 1/100           | FITC                |
