# Supplementary material for: Fibrin biopolymer as scaffold candidate to treat bone defects in rats
Source: PubMed Central journal article supplement (PMC6830407; doi:10.1590/1678-9199-jvatitd-2019-0027), 2019-11-04
Supplement: 1678-9199-jvatitd-25-e20190027-s2.pdf [file 1678-9199-jvatitd-25-e20190027-s2.pdf]

## Supplementary Material to “Fibrin biopolymer as scaffold candidate to treat bone defects in rats”

**Additional file 2** – Qualitative analysis of images obtained by computed tomography

| <b>30 days</b>       |                                            |                                                    |                                   |                                                                       |                                                    |
|----------------------|--------------------------------------------|----------------------------------------------------|-----------------------------------|-----------------------------------------------------------------------|----------------------------------------------------|
|                      | <b>Group 1</b>                             | <b>Group 2</b>                                     | <b>Group 3</b>                    | <b>Group 4</b>                                                        | <b>Group 5</b>                                     |
| <b>Proliferation</b> | Absent                                     | Discreet bone proliferation with irregular surface | Discreet                          | Discreet with bone proliferation of lamellar aspect                   | Discreet bone proliferation with irregular surface |
| <b>Remodeling</b>    | Discreet remodeling with irregular surface | Discreet remodeling with irregular surface         | Remodeling with irregular surface | Cortical on remodeling phase. Presence of mineralized thin connection | Remodeling with irregular surface                  |

  

| <b>60 days</b>       |                                                                                                     |                                                                               |                                                                                                                     |                                                         |                                                                           |
|----------------------|-----------------------------------------------------------------------------------------------------|-------------------------------------------------------------------------------|---------------------------------------------------------------------------------------------------------------------|---------------------------------------------------------|---------------------------------------------------------------------------|
|                      | <b>Group 1</b>                                                                                      | <b>Group 2</b>                                                                | <b>Group 3</b>                                                                                                      | <b>Group 4</b>                                          | <b>Group 5</b>                                                            |
| <b>Proliferation</b> | Area between the edges of the defect                                                                | Discreet with irregular surface                                               | Discreet with irregular surface                                                                                     | Exuberant bone proliferation with regular surface       | Discreet formation with irregular surface                                 |
| <b>Remodeling</b>    | Cortical misalignment, visualization of the defect, discreet area of density and spacing of borders | In remodeling process, irregular surface and non-visualization of full defect | In remodeling process, irregular surface, discreet area with density slightly smaller than the rest of the cortical | In remodeling process, non-visualization of full defect | In remodeling process, visualization of defect, but with medullar filling |
