# Supplementary material for: Fibrin biopolymer as scaffold candidate to treat bone defects in rats
Source: PubMed Central journal article supplement (PMC6830407; doi:10.1590/1678-9199-jvatitd-2019-0027), 2019-11-04
Supplement: 1678-9199-jvatitd-25-e20190027-s3.pdf [file 1678-9199-jvatitd-25-e20190027-s3.pdf]

## Supplementary Material to “Fibrin biopolymer as scaffold candidate to treat bone defects in rats”

**Additional file 3.** Results of stereological analysis.

| <b>30 DAYS</b>      |              |              |              |              |              |                  |
|---------------------|--------------|--------------|--------------|--------------|--------------|------------------|
| <b>Group-Animal</b> | <b>FB</b>    | <b>BL</b>    | <b>RL</b>    | <b>CT</b>    | <b>BW</b>    | <b>rel. tot.</b> |
| <b>G1-1</b>         | 63.0%        | 0.0%         | 0.0%         | 0.0%         | 37.0%        | 100%             |
| <b>G1-2</b>         | 51.0%        | 0.0%         | 0.0%         | 0.0%         | 49.0%        | 100%             |
| <b>G1-3</b>         | 52.8%        | 0.0%         | 0.0%         | 0.0%         | 47.2%        | 100%             |
| <b>G1-4</b>         | 59.4%        | 0.0%         | 0.0%         | 0.0%         | 40.6%        | 100%             |
| <b>MEAN</b>         | <b>56.5%</b> | <b>0.0%</b>  | <b>0.0%</b>  | <b>0.0%</b>  | <b>43.5%</b> | <b>100%</b>      |
| <b>G2-1</b>         | 39.7%        | 52.9%        | 0.0%         | 0.0%         | 7.4%         | 100%             |
| <b>G2-2</b>         | 32.0%        | 32.8%        | 1.6%         | 0.0%         | 33.6%        | 100%             |
| <b>G2-3</b>         | 42.7%        | 31.3%        | 6.1%         | 0.0%         | 19.8%        | 100%             |
| <b>G2-4</b>         | 40.7%        | 33.0%        | 5.9%         | 0.0%         | 20.3%        | 100%             |
| <b>MEAN</b>         | <b>38.8%</b> | <b>37.5%</b> | <b>3.4%</b>  | <b>0.0%</b>  | <b>20.3%</b> | <b>100%</b>      |
| <b>G3-1</b>         | 22.0%        | 27.2%        | 14.4%        | 33.3%        | 3.0%         | 100%             |
| <b>G3-2</b>         | 32.6%        | 20.4%        | 2.3%         | 34.1%        | 10.6%        | 100%             |
| <b>G3-3</b>         | 26.5%        | 21.6%        | 8.1%         | 36.3%        | 7.1%         | 100%             |
| <b>G3-4</b>         | 32.6%        | 24.2%        | 3.8%         | 28.8%        | 10.6%        | 100%             |
| <b>MEAN</b>         | <b>28.4%</b> | <b>23.4%</b> | <b>7.1%</b>  | <b>33.1%</b> | <b>7.8%</b>  | <b>100%</b>      |
| <b>G4-1</b>         | 67.0%        | 0.0%         | 0.0%         | 0.0%         | 33.0%        | 100%             |
| <b>G4-2</b>         | 66.9%        | 0.0%         | 0.0%         | 0.0%         | 33.1%        | 100%             |
| <b>G4-3</b>         | 68.3%        | 0.0%         | 0.0%         | 0.0%         | 31.7%        | 100%             |
| <b>G4-4</b>         | 59.1%        | 0.0%         | 0.0%         | 0.0%         | 40.9%        | 100%             |
| <b>MEAN</b>         | <b>65.3%</b> | <b>0.0%</b>  | <b>0.0%</b>  | <b>0.0%</b>  | <b>34.7%</b> | <b>100%</b>      |
| <b>G5-1</b>         | 19.8%        | 28.1%        | 30.2%        | 21.8%        | 0.0%         | 100%             |
| <b>G5-2</b>         | 36.1%        | 29.2%        | 15.5%        | 13.7%        | 5.6%         | 100%             |
| <b>G5-3</b>         | 54.3%        | 21.7%        | 20.2%        | 3.8%         | 0.0%         | 100%             |
| <b>G5-4</b>         | 48.9%        | 26.0%        | 14.5%        | 6.9%         | 3.8%         | 100%             |
| <b>MEAN</b>         | <b>39.8%</b> | <b>26.2%</b> | <b>20.1%</b> | <b>11.5%</b> | <b>2.3%</b>  | <b>100%</b>      |

**FB:** newly formed bone. **BL:** calcium phosphate biomaterial. **RL:** resorption lacunae.  
**CT:** cellular connective tissue. **BW:** bone marrow. **Rel. tot:** relative total.

| 60 DAYS      |              |              |              |             |              |             |
|--------------|--------------|--------------|--------------|-------------|--------------|-------------|
| Group-Animal | FB           | BL           | RL           | CT          | BW           | rel. tot.   |
| G1-1         | 68%          | 0%           | 0%           | 0%          | 32%          | 100%        |
| G1-2         | 42.0%        | 0.0%         | 0.0%         | 0.0%        | 58.0%        | 100%        |
| G1-3         | 57.0%        | 0.0%         | 0.0%         | 0.0%        | 43.0%        | 100%        |
| G1-4         | 63.7%        | 0.0%         | 0.0%         | 0.0%        | 36.3%        | 100%        |
| <b>MEAN</b>  | <b>57.6%</b> | <b>0.0%</b>  | <b>0.0%</b>  | <b>0.0%</b> | <b>42.4%</b> | <b>100%</b> |
| G2-1         | 52.0%        | 16.7%        | 21.3%        | 0.0%        | 10.0%        | 100%        |
| G2-2         | 48.6%        | 36.4%        | 7.9%         | 0.0%        | 7.1%         | 100%        |
| G2-3         | 27.3%        | 42.4%        | 9.8%         | 0.0%        | 20.5%        | 100%        |
| G2-4         | 53.8%        | 22.7%        | 12.9%        | 0.0%        | 10.6%        | 100%        |
| <b>MEAN</b>  | <b>45.4%</b> | <b>29.6%</b> | <b>13.0%</b> | <b>0.0%</b> | <b>12.0%</b> | <b>100%</b> |
| G3-1         | 56.8%        | 16.4%        | 12.4%        | 4.0%        | 10.4%        | 100%        |
| G3-2         | 47.6%        | 19.0%        | 25.5%        | 2.0%        | 5.9%         | 100%        |
| G3-3         | 45.1%        | 26.6%        | 21.3%        | 0.0%        | 6.9%         | 100%        |
| G3-4         | 44.1%        | 27.7%        | 18.4%        | 2.0%        | 7.8%         | 100%        |
| <b>MEAN</b>  | <b>48.4%</b> | <b>22.4%</b> | <b>19.4%</b> | <b>2.0%</b> | <b>7.8%</b>  | <b>100%</b> |
| G4-1         | 71.4%        | 0.0%         | 0.0%         | 0.0%        | 28.6%        | 100%        |
| G4-2         | 78.1%        | 0.0%         | 0.0%         | 0.0%        | 21.9%        | 100%        |
| G4-3         | 75.5%        | 0.0%         | 0.0%         | 0.0%        | 24.5%        | 100%        |
| G4-4         | 75.0%        | 0.0%         | 0.0%         | 0.0%        | 25.0%        | 100%        |
| <b>MEAN</b>  | <b>75.0%</b> | <b>0.0%</b>  | <b>0.0%</b>  | <b>0.0%</b> | <b>25.0%</b> | <b>100%</b> |
| G5-1         | 50.4%        | 32.2%        | 16.0%        | 0.0%        | 1.4%         | 100%        |
| G5-2         | 63.5%        | 22.8%        | 12.8%        | 0.0%        | 0.8%         | 100%        |
| G5-3         | 53.0%        | 31.3%        | 11.1%        | 0.0%        | 4.5%         | 100%        |
| G5-4         | 66.6%        | 18.4%        | 15.1%        | 0.0%        | 0.0%         | 100%        |
| <b>MEAN</b>  | <b>58.4%</b> | <b>26.2%</b> | <b>13.7%</b> | <b>0.0%</b> | <b>1.7%</b>  | <b>100%</b> |

FB: newly formed bone. BL: calcium phosphate biomaterial. RL: resorption lacunae.  
 CT: cellular connective tissue. BW: bone marrow. Rel. tot: relative total.
