# Supplementary material for: Fibrin biopolymer as scaffold candidate to treat bone defects in rats
Source: PubMed Central journal article supplement (PMC6830407; doi:10.1590/1678-9199-jvatitd-2019-0027), 2019-11-04
Supplement: 1678-9199-jvatitd-25-e20190027-s4.pdf [file 1678-9199-jvatitd-25-e20190027-s4.pdf]

## Supplementary Material to “Fibrin biopolymer as scaffold candidate to treat bone defects in rats”

**Additional file 4.** Statistical analysis

| <b>Group</b> |                | <b>FB 30</b> | <b>BW 30</b> | <b>FB 60</b> | <b>BW 60</b> | <b>DIFFB</b> | <b>DIFBW</b> |
|--------------|----------------|--------------|--------------|--------------|--------------|--------------|--------------|
| <b>1</b>     | Mean           | 56.550       | 43.450       | 57.675       | 42.325       | 1.125        | -1.125       |
|              | Std. Deviation | 5.6152       | 5.6152       | 11.3881      | 11.3881      | 6.7594       | 6.7594       |
| <b>2</b>     | Mean           | 38.775       | 20.275       | 45.425       | 12.050       | 6.650        | -8.225       |
|              | Std. Deviation | 4.6857       | 10.7012      | 12.2742      | 5.8370       | 14.8181      | 13.3290      |
| <b>3</b>     | Mean           | 28.425       | 7.825        | 48.400       | 7.750        | 19.975       | -.075        |
|              | Std. Deviation | 5.1591       | 3.6151       | 5.7902       | 1.9296       | 10.2996      | 5.3137       |
| <b>4</b>     | Mean           | 65.325       | 34.675       | 75.000       | 25.000       | 9.675        | -9.675       |
|              | Std. Deviation | 4.1987       | 4.1987       | 2.7580       | 2.7580       | 5.0009       | 5.0009       |
| <b>5</b>     | Mean           | 39.775       | 2.350        | 58.375       | 1.675        | 18.600       | -.675        |
|              | Std. Deviation | 15.3487      | 2.8113       | 7.8826       | 1.9687       | 14.3557      | 4.3919       |

**FB30:** newly formed bone 30 days after surgical procedure; **FB60:** newly formed bone 60 days after surgical procedure; **BW30:** bone marrow presence 30 days after surgical procedure; **BW60:** bone marrow presence 60 days after surgical procedure; **Dif:** difference between 30 and 60 days.
